# Supplementary material for: MicroRNA-106b-5p inhibits growth and progression of lung adenocarcinoma cells by downregulating IGSF10
Source: publisher site journal article supplement (doi:10.18632/aging.203318), 2021-07-29
Supplement: Supplementary file [file aging-v13i14-203318-supplementary-material-SD1.pdf]

## SUPPLEMENTARY FIGURE

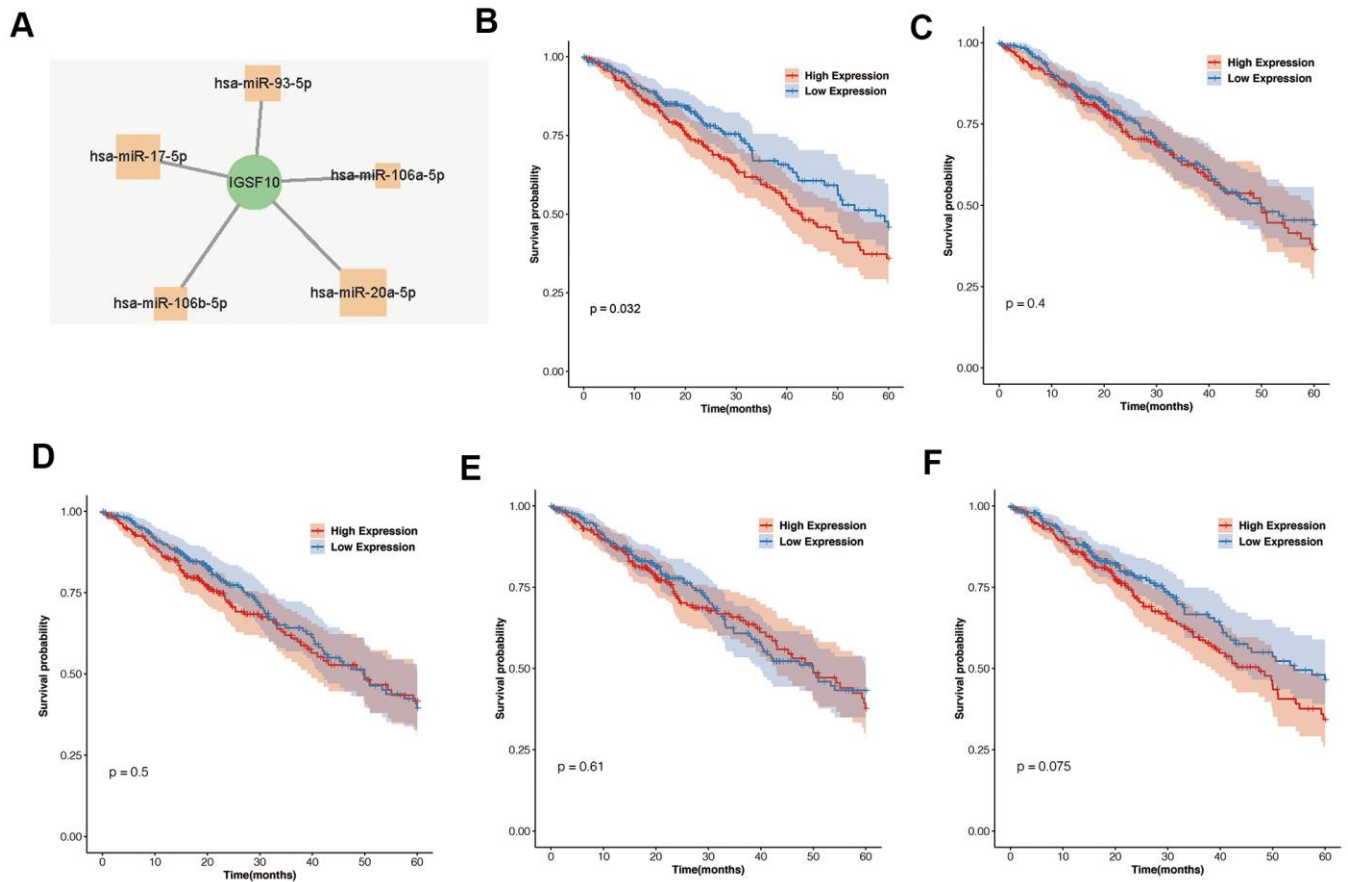

**Supplementary Figure 1. Bioinformatics and survival analysis of potential IGSF10-binding miRNAs.** (A) MiRwalk2.0 database analysis shows miRNAs that potentially bind to the 3'-UTR of IGSF10. (B–F) Kaplan-Meier survival curves show overall survival of LUAD patients with high- and low-expression levels of hsa-miR-17-5p, hsa-miR-106a-5p, hsa-miR-106b-5p, hsa-miR-93-5p, and hsa-miR-20a-5p, all of which potentially bind to the 3'UTR of IGSF10. The abscissa represents survival time; the ordinate represents survival probability.
